# Supplementary material for: Effects of Polypharmacy on Adverse Drug Reactions among Geriatric Outpatients at a Tertiary Care Hospital in Karachi: A Prospective Cohort Study
Source: PubMed Central journal article supplement (PMC4234513; doi:10.1371/journal.pone.0112133), 2014-11-17
Supplement: pone.0112133.s001.pdf [file pone.0112133.s001.pdf]

**FORM 1 BASE LINE INFORMATION**

|                                                                                       |  |                  |  |
|---------------------------------------------------------------------------------------|--|------------------|--|
| <b>Identifier:</b>                                                                    |  | <b>MR NO</b>     |  |
| Clinic Number                                                                         |  | Interviewer name |  |
| Date of interview                                                                     |  |                  |  |
| Time of interview:<br><b>Start</b> _____ <b>am/ pm</b> <b>end</b> _____ <b>am/ pm</b> |  |                  |  |

| No. | Questions                        | Codes                                                                                                                            | Skip | Responses                                                                            |
|-----|----------------------------------|----------------------------------------------------------------------------------------------------------------------------------|------|--------------------------------------------------------------------------------------|
| 1.  | Name of Participant              |                                                                                                                                  |      | -----                                                                                |
| 2.  | Gender                           | a) Male<br>b) Female                                                                                                             |      |                                                                                      |
| 3.  | Residential Address              |                                                                                                                                  |      |                                                                                      |
| 4.  | Telephone (very important)       |                                                                                                                                  |      | Residential:-----<br>Mobile:-----                                                    |
| 5.  | Who is your primary care giver?  |                                                                                                                                  |      | Name: _____<br>Relation: _____<br>Mobile: _____<br>Best available time for interview |
| 6.  | Age ( years)                     |                                                                                                                                  |      | _____                                                                                |
| 7.  | Height in feet                   |                                                                                                                                  |      |                                                                                      |
| 8.  | Weight in Kg                     |                                                                                                                                  |      |                                                                                      |
| 9.  | Temperature                      |                                                                                                                                  |      |                                                                                      |
| 10. | What is your educational status? | a) Cannot read and write<br>b) Primary<br>c) Middle<br>d) Matriculate<br>e) Intermediate<br>f) Graduate<br>g) Post graduate      |      |                                                                                      |
| 11. | Occupation                       | a) Housewife/ not employed<br>b) Govt. servant<br>c) Armed forces<br>d) Business<br>e) Teacher<br>f) Private firm<br>g) Domestic |      |                                                                                      |

|     |                                                               |                                                                                                                                               |              |  |
|-----|---------------------------------------------------------------|-----------------------------------------------------------------------------------------------------------------------------------------------|--------------|--|
|     |                                                               | h) servant<br>i) Student<br>Self-employed                                                                                                     |              |  |
| 12. | What is the current diagnosis?<br>(check from file and write) |                                                                                                                                               |              |  |
| 13. | Other co-morbidities                                          |                                                                                                                                               |              |  |
| 14. | Previous medications                                          | a) No previous medications<br>b) -----<br>---<br>c) -----<br>---<br>d) -----<br>---<br>e) -----<br>---                                        | if a skip to |  |
| 15. | Previous Medications Dose                                     | a) -----<br>---<br>b) -----<br>---<br>c) -----<br>---<br>d) -----<br>--<br>e) -----<br>--                                                     |              |  |
| 16. | Previous Medications Duration                                 |                                                                                                                                               |              |  |
| 17. | Current Medications                                           | a) -----<br>--<br>b) -----<br>--<br>c) -----<br>--<br>d) -----<br>-<br>e) -----<br>--<br>f) -----<br>---<br>g) -----<br>--<br>h) -----<br>--- |              |  |
| 18. | Current Medications Dosage                                    |                                                                                                                                               |              |  |

|     |                                                                                          |                 |  |  |
|-----|------------------------------------------------------------------------------------------|-----------------|--|--|
| 19. | Current Medications Duration                                                             |                 |  |  |
| 20. | Is this Polypharmacy?<br>(RMO will review the profile<br>and label patient as yes or no) | a) Yes<br>b) No |  |  |
| 21. | Name of Physician patient<br>registered with?                                            |                 |  |  |
| 22. | Are you currently taking any<br>herbal medications?                                      | a) Yes<br>b) No |  |  |
| 23. | Are you currently taking any<br>homeopathic medications?                                 | a) Yes<br>b) No |  |  |

---

### Follow-up Form

|                    |  |                  |  |
|--------------------|--|------------------|--|
| ID NO              |  | MR NO            |  |
| Clinic Number      |  | Interviewer name |  |
| Date of interview  |  |                  |  |
| Time of interview: |  |                  |  |

Start \_\_\_\_\_ am/ pm      End \_\_\_\_\_ am/ pm

My name is \_\_\_\_\_ and I am a research medical officer for the study you consented to yesterday. . You are participating in a study to improve the way medications are prescribed.

Is this a good time for you to talk?

*If not* - - - - When would be a good time for us to call you?

This interview will last approximately 15 minutes. Would you like to participate?

*If not* - - - - Thank you very much for your time.

Patients sometimes experience problems due to their medications. We want to better understand how often they occur and how they can be prevented.

We are interviewing patients who have been prescribed medication by their doctor. This interview will start off by asking you for some basic health information. I will then ask you some specific questions about the medications you have been prescribed and about any non-prescription medications that you use regularly.

Let me assure you that that the information you provide is completely confidential (as previously mentioned in the consent as well). Your participation is voluntary and you may skip any questions that you do not feel comfortable answering. Also, you may stop the interview at any time.

In order to use our time most effectively, would you please take a few moments now to collect in front of you all the medications and dietary or herbal supplements which you take on a regular basis, both prescription and non-prescription.

|                                                                                                                 |                                                                                                                                                                                                                               |
|-----------------------------------------------------------------------------------------------------------------|-------------------------------------------------------------------------------------------------------------------------------------------------------------------------------------------------------------------------------|
| <p>1 Did you fill your Prescription?</p>                                                                        | <p>No</p> <p>Yes (skip to question #7)</p>                                                                                                                                                                                    |
| <p>2 If no- why not (stop - do not continue with follow-up)</p>                                                 | <p>1 No time, too busy</p> <p>2 Still have some old medications left</p> <p>3 Afraid to take medication</p> <p>4 Couldn't afford medication</p> <p>5 Not covered by insurance</p> <p>6 Don't need it</p> <p>7 Other _____</p> |
| <p>3 When did you fill this prescription?</p>                                                                   | <p>___/___/___</p>                                                                                                                                                                                                            |
| <p>4 Please read the directions for use directly from the medication bottle.</p>                                | <p>_____</p> <p>_____</p> <p>_____</p>                                                                                                                                                                                        |
| <p>5 What was the total quantity dispensed to you? Please read any precautions or warnings from the bottle.</p> | <p>Quantity dispensed:</p> <p>_____</p> <p>_____</p> <p>_____</p> <p>_____</p> <p>Precautions/Warnings:</p> <p>_____</p> <p>_____</p> <p>_____</p> <p>_____</p> <p>_____</p>                                                  |

|  |       |
|--|-------|
|  | _____ |
|--|-------|

The next few questions ask you about information you received when you were given your prescription.

|                                                                                                     |                                                                                                                                                                                                                                                                                  |
|-----------------------------------------------------------------------------------------------------|----------------------------------------------------------------------------------------------------------------------------------------------------------------------------------------------------------------------------------------------------------------------------------|
| <p>6 When you received your prescription, did your doctor tell you what the medication was for?</p> | <p>1 No</p> <p>2 Yes</p> <p>3 Don't know</p>                                                                                                                                                                                                                                     |
| <p>7 Did your doctor tell you about the possible side effects?</p>                                  | <p>1 No</p> <p>2 Yes</p> <p>3 Don't know</p>                                                                                                                                                                                                                                     |
| <p>8 When you got your prescription filled, did your pharmacist offer you verbal counseling?</p>    | <p>1 No (skip to #14)</p> <p>2 Yes</p> <p>3 Don't know</p>                                                                                                                                                                                                                       |
| <p>9 Did you accept verbal counseling from the pharmacist?</p>                                      | <p>1 No</p> <p>2 Yes (skip to question #15)</p>                                                                                                                                                                                                                                  |
| <p>10 If no, why not?<br/>(answer question and then skip to question #16)</p>                       | <p>Was not offered to me:</p> <p>1. I already got information from my MD</p> <p>2. Medication was a refill-got information from my pharmacist before</p> <p>3. I waited long enough and did not have enough time</p> <p>4. I didn't think I needed any</p> <p>5. Other _____</p> |

|                                                                                |                                        |
|--------------------------------------------------------------------------------|----------------------------------------|
|                                                                                |                                        |
| 11 Specifically, did the pharmacist tell you what the medication was for?      | 1 No<br>2 Yes<br>3 Don't know/remember |
| 12 Did the pharmacist tell you about possible side effects?                    | 1 No<br>2 Yes<br>3 Don't know/remember |
| 13 Did you get printed information about this medication from your pharmacist? | 1 No<br>2 Yes<br>3 Don't know/remember |

14 How many prescription bottles do you have in front of you? \_\_\_\_\_

Would you please answer the following questions by reading directly from your medication bottles.

| Medication Name | Type of prescription |        |    | What do you take this medication for? |   |               |
|-----------------|----------------------|--------|----|---------------------------------------|---|---------------|
|                 | New                  | Refill | DK | DK                                    | K | If K, specify |
| 1-              |                      |        |    |                                       |   |               |
|                 |                      |        |    |                                       |   |               |
| 2-              |                      |        |    |                                       |   |               |
|                 |                      |        |    |                                       |   |               |
| 3-              |                      |        |    |                                       |   |               |
|                 |                      |        |    |                                       |   |               |
| 4-              |                      |        |    |                                       |   |               |
|                 |                      |        |    |                                       |   |               |
| 5-              |                      |        |    |                                       |   |               |
|                 |                      |        |    |                                       |   |               |
| 6-              |                      |        |    |                                       |   |               |
|                 |                      |        |    |                                       |   |               |
| 7-              |                      |        |    |                                       |   |               |
|                 |                      |        |    |                                       |   |               |
| 8-              |                      |        |    |                                       |   |               |
|                 |                      |        |    |                                       |   |               |
| 9-              |                      |        |    |                                       |   |               |
|                 |                      |        |    |                                       |   |               |
| 10-             |                      |        |    |                                       |   |               |
|                 |                      |        |    |                                       |   |               |
| 11-             |                      |        |    |                                       |   |               |
|                 |                      |        |    |                                       |   |               |
| 12-             |                      |        |    |                                       |   |               |



|     |  |  |  |  |  |  |
|-----|--|--|--|--|--|--|
|     |  |  |  |  |  |  |
| 13- |  |  |  |  |  |  |
|     |  |  |  |  |  |  |
| 14- |  |  |  |  |  |  |
|     |  |  |  |  |  |  |
| 15- |  |  |  |  |  |  |
|     |  |  |  |  |  |  |
| 16- |  |  |  |  |  |  |
|     |  |  |  |  |  |  |
| 17- |  |  |  |  |  |  |
|     |  |  |  |  |  |  |

K= Know      DK= Don't Know

|                                                                                                        |                                                                                                                                                                                                                                                          |
|--------------------------------------------------------------------------------------------------------|----------------------------------------------------------------------------------------------------------------------------------------------------------------------------------------------------------------------------------------------------------|
| <p>15 Generally do you take <b>all</b> the doses of your medications as prescribed by your doctor?</p> | <p>1 No (specify medication)_____</p> <p>2 Yes</p> <p>3 Don't know</p> <p>4 Refuse to answer</p> <p>5 Not applicable</p>                                                                                                                                 |
| <p>16 What do you usually do if you miss a dose of medication?</p>                                     | <p>1 Take an extra dose</p> <p>2 Skip that dose</p> <p>3 It varies with the medication</p> <p>4 Don't know/remember</p> <p>5 Never miss a dose (skip to question #23)</p> <p>6 Take as soon as I remember</p>                                            |
| <p>17 In the last week, how many doses do you think you have missed?</p>                               | <p>1 None</p> <p>2 One</p> <p>3 Two</p> <p>4 Three</p> <p>5 Four</p> <p>6 Five</p> <p>7 Six or more</p>                                                                                                                                                  |
| <p>18 Why did you miss these doses? (multiples may be checked)</p>                                     | <p>1 Forgot to take medication</p> <p>2 Ran out of medication</p> <p>3 Medication not available (misplaced or not with patient at time of dose)</p> <p>4 Felt that medication was not needed</p> <p>5 Side effect of medication</p> <p>6 Other _____</p> |
| <p>19 In the last week, how many additional doses do you think you have taken?</p>                     | <p>1 None (stop - skip to question #24)</p> <p>2 One</p> <p>3 Two</p> <p>4 Three</p> <p>5 Four</p> <p>6 Five</p> <p>7 Six or more</p>                                                                                                                    |
| <p>20 Why were the extra doses taken?</p>                                                              | <p>1 Tried to catch up</p> <p>2 Thought it was better to take more</p> <p>3 Forgot that medication was already taken</p> <p>4 Other _____</p>                                                                                                            |

Now we're going to talk about any non-prescription medications which you use.

21 Do you take any non-prescription drugs (herbal supplements, over-the counter drugs, dietary supplements) on a regular basis?

- 1 No ( do not as question 25)
- 2 Yes

The following questions will ask you the names, strengths and reasons for use of all of the non-prescription medications you use regularly. Again, please answer by reading directly from your medication bottles. How many bottles do you have in front of you? \_\_\_\_\_

22 Non-prescription Medication list:

| Medication Name and Strength | How frequently do you take this medication?<br><input type="checkbox"/> daily<br><input type="checkbox"/> weekly<br><input type="checkbox"/> monthly | What do you take this medication for?<br><br>DK - don't know | Have you had any problems with this medication? |     |                 |
|------------------------------|------------------------------------------------------------------------------------------------------------------------------------------------------|--------------------------------------------------------------|-------------------------------------------------|-----|-----------------|
|                              |                                                                                                                                                      |                                                              | No                                              | Yes | If yes, specify |
| 1-                           |                                                                                                                                                      |                                                              |                                                 |     |                 |
|                              |                                                                                                                                                      |                                                              |                                                 |     |                 |
| 2-                           |                                                                                                                                                      |                                                              |                                                 |     |                 |
|                              |                                                                                                                                                      |                                                              |                                                 |     |                 |
| 3-                           |                                                                                                                                                      |                                                              |                                                 |     |                 |
|                              |                                                                                                                                                      |                                                              |                                                 |     |                 |
| 4-                           |                                                                                                                                                      |                                                              |                                                 |     |                 |
|                              |                                                                                                                                                      |                                                              |                                                 |     |                 |

|    |  |  |  |  |  |
|----|--|--|--|--|--|
| 5- |  |  |  |  |  |
|    |  |  |  |  |  |
| 6- |  |  |  |  |  |
|    |  |  |  |  |  |
| 7- |  |  |  |  |  |
|    |  |  |  |  |  |



|                                                 |  |  |  |  |  |  |  |
|-------------------------------------------------|--|--|--|--|--|--|--|
| 24.8 Incontinence or trouble holding your urine |  |  |  |  |  |  |  |
| 24.9 Problems with sexual function              |  |  |  |  |  |  |  |
| 24.10 Skin rash or itching                      |  |  |  |  |  |  |  |
| 24.11 Other _____                               |  |  |  |  |  |  |  |
